# Supplementary figures and images for: Reelin cells and sex‐dependent synaptopathology in autism following postnatal immune activation
Source: PubMed Central journal article supplement — Br J Pharmacol. 2022 May 23;179(17):4400–22. doi: 10.1111/bph.15859 (PMC9545289; doi:10.1111/bph.15859), 2022-05-23

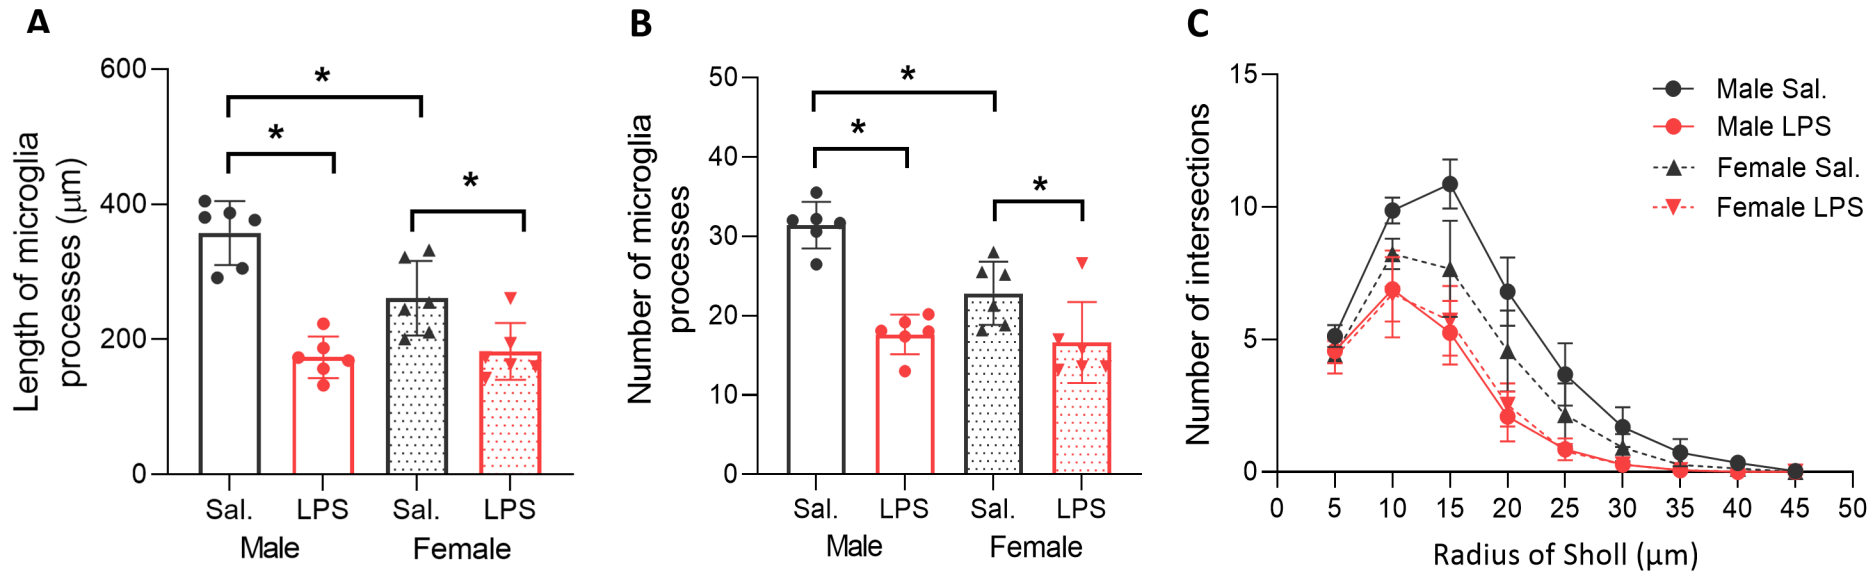

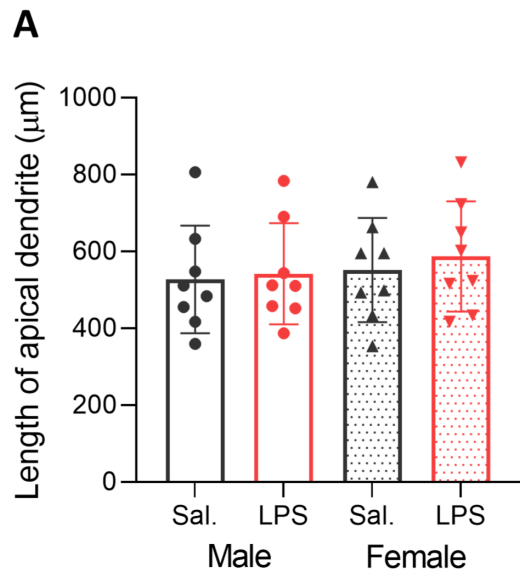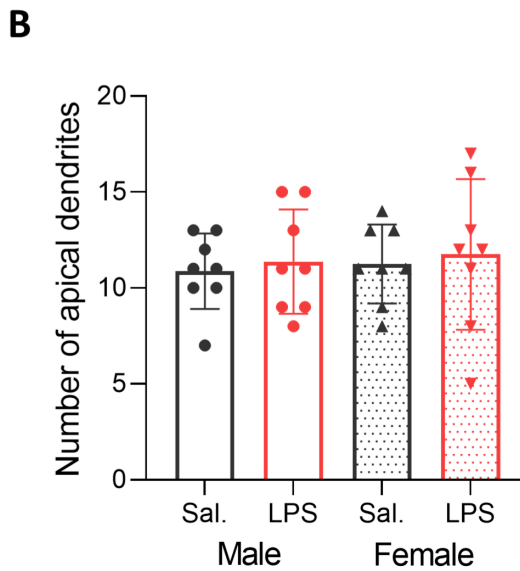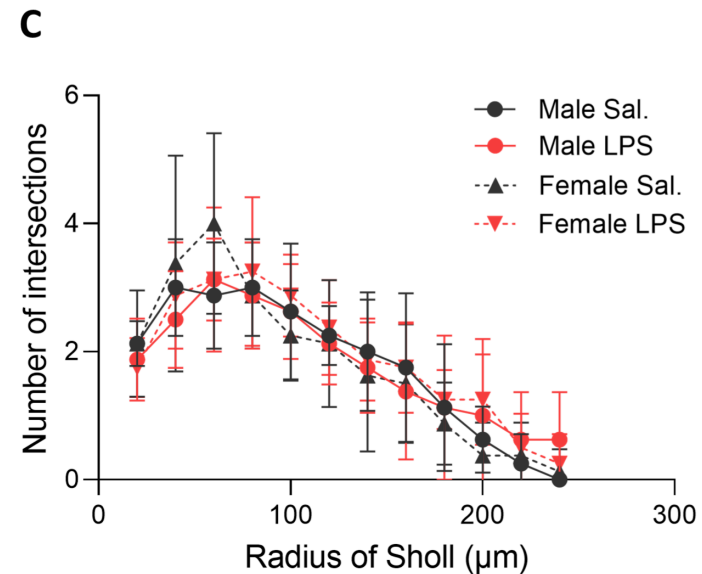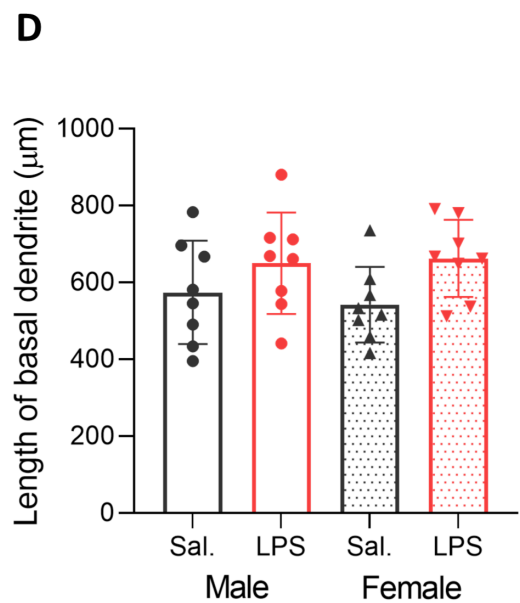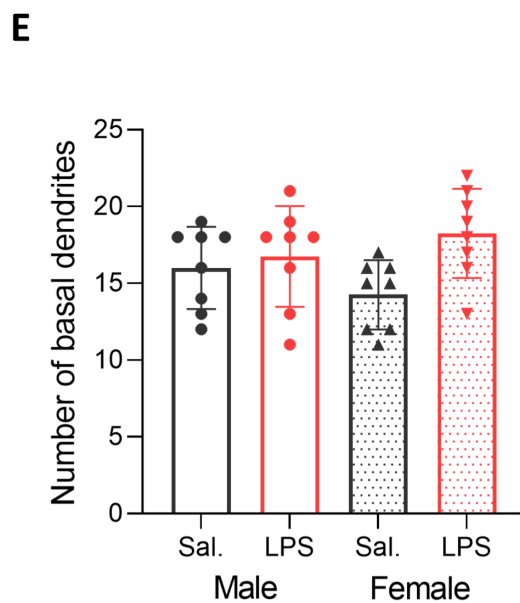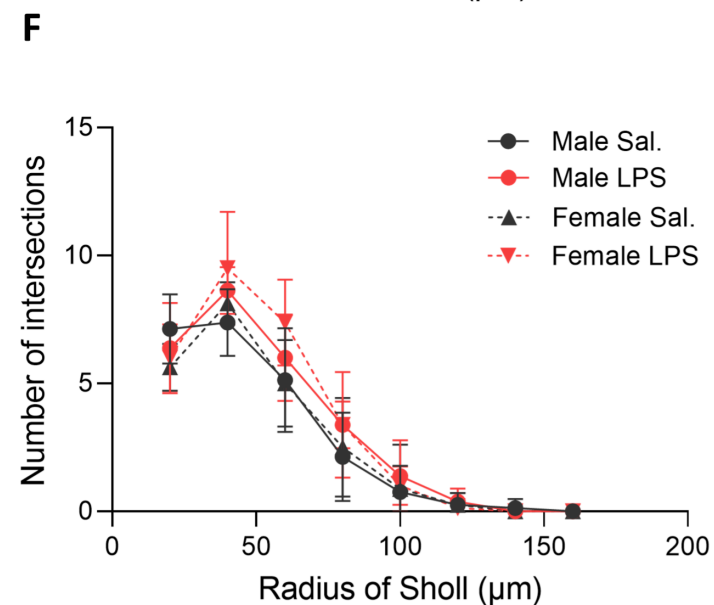

**A**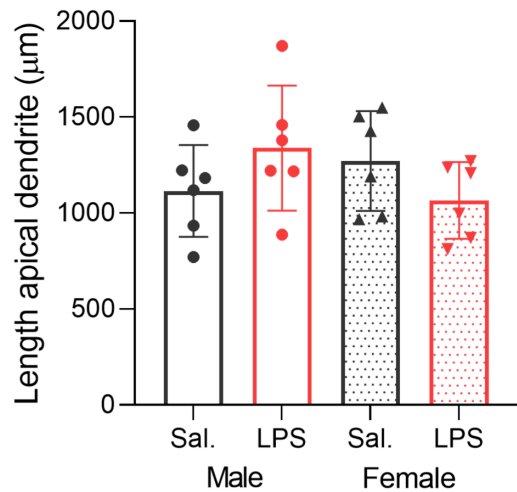**B**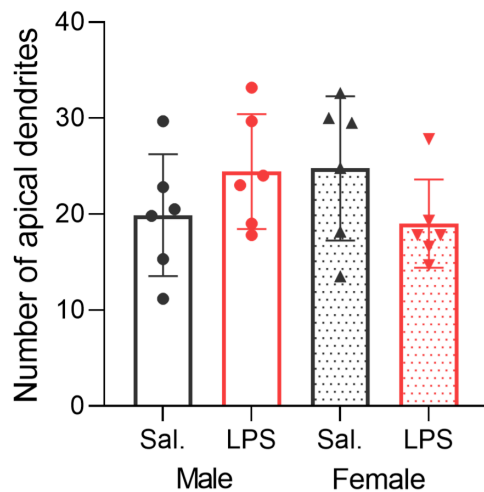**C**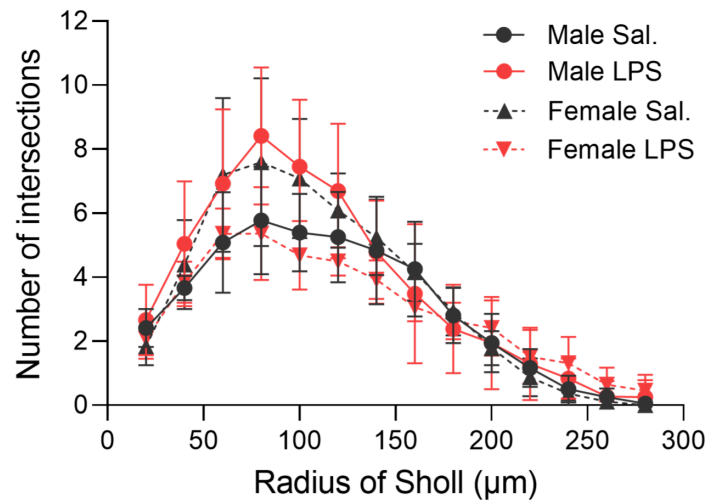**D**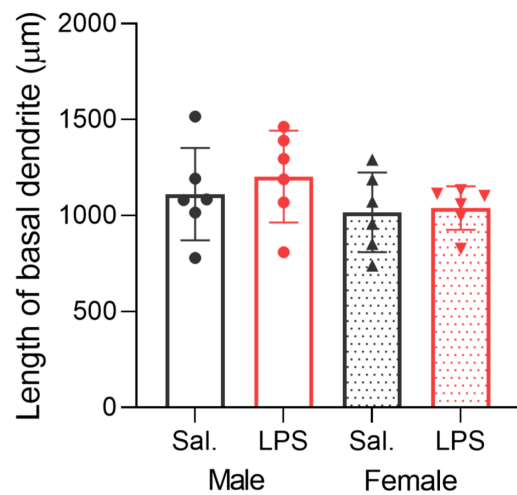**E**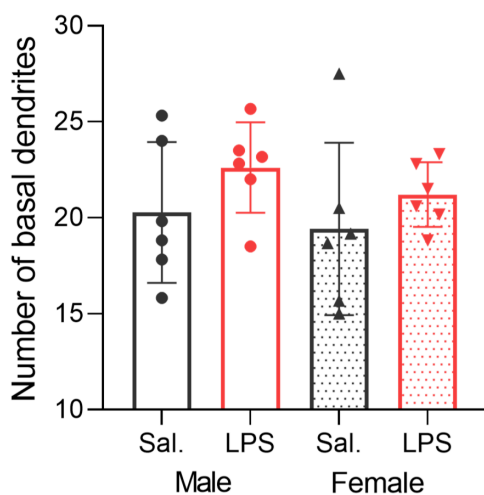**F**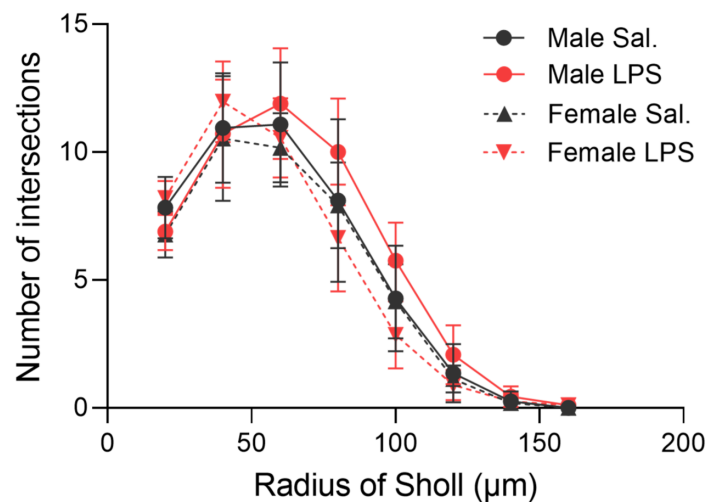

**A**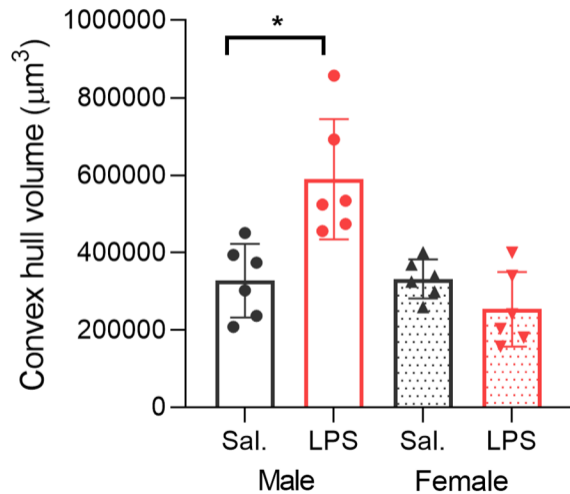**B**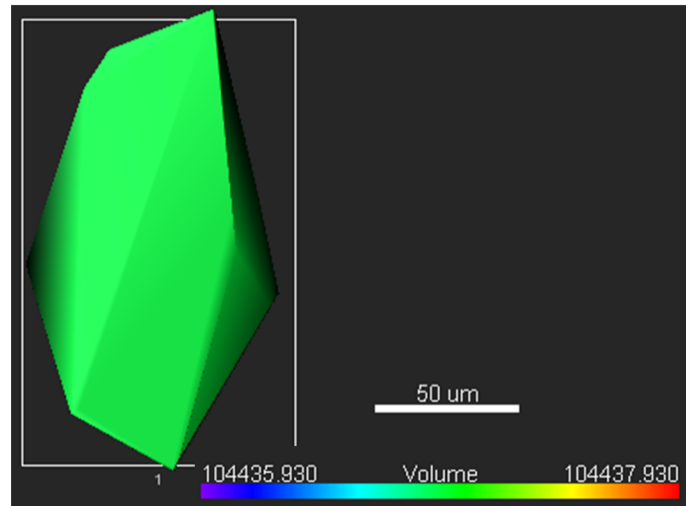**C**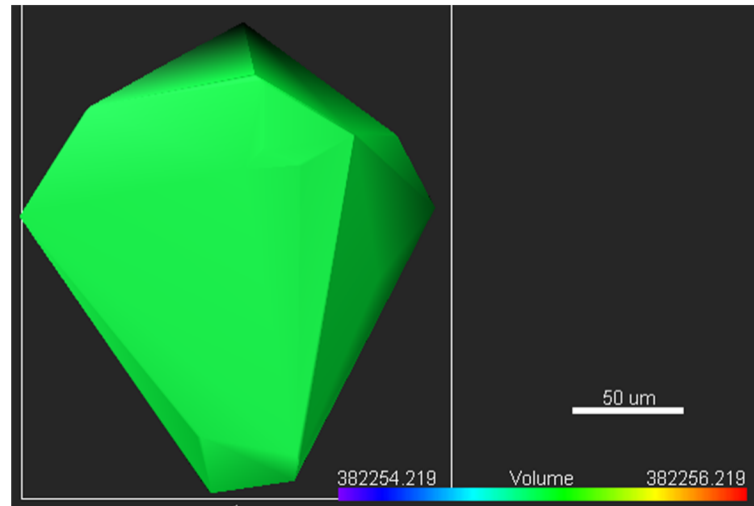

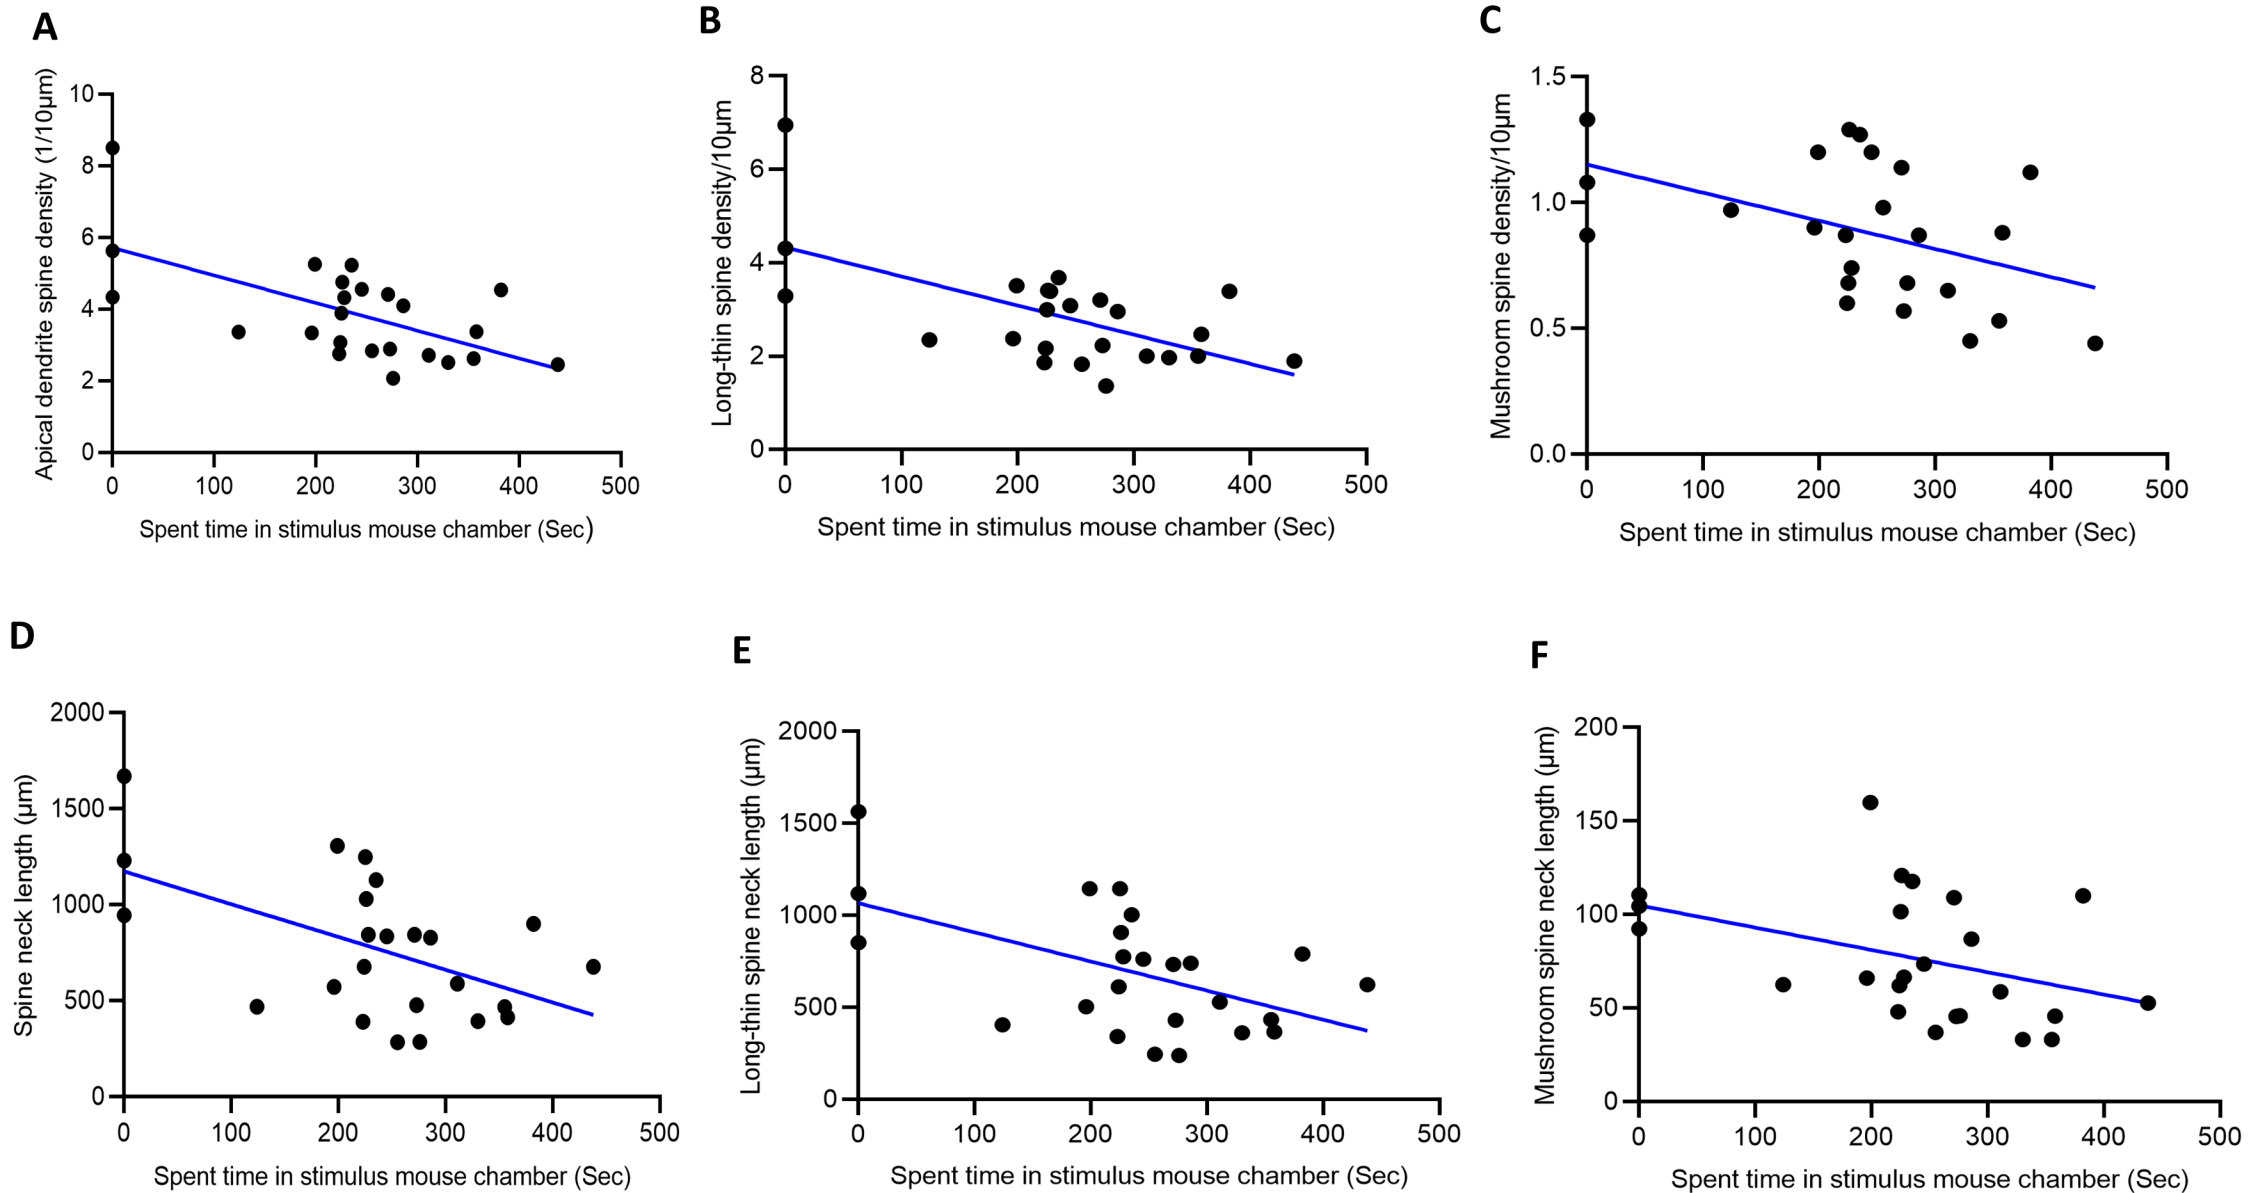

# P12 Basal dendrite

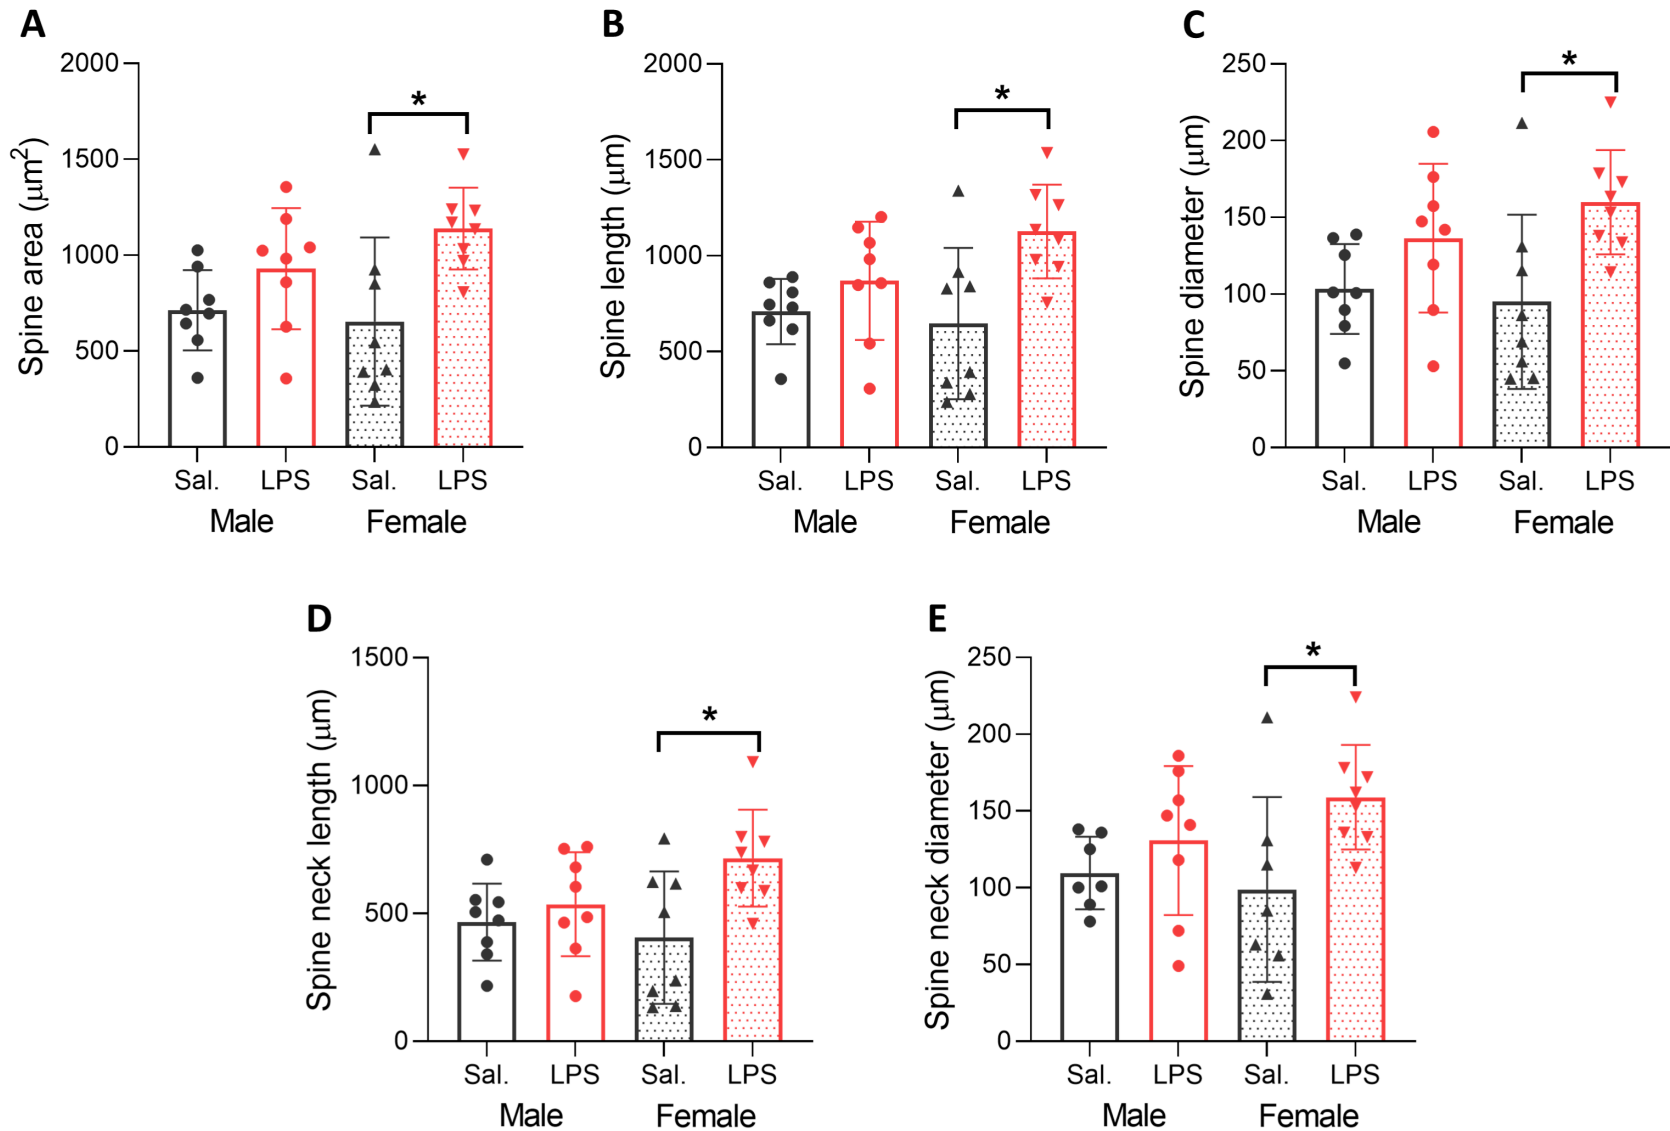

# P45 Basal dendrite

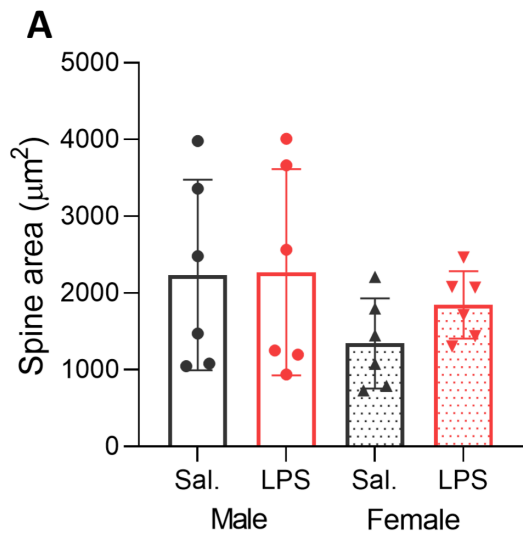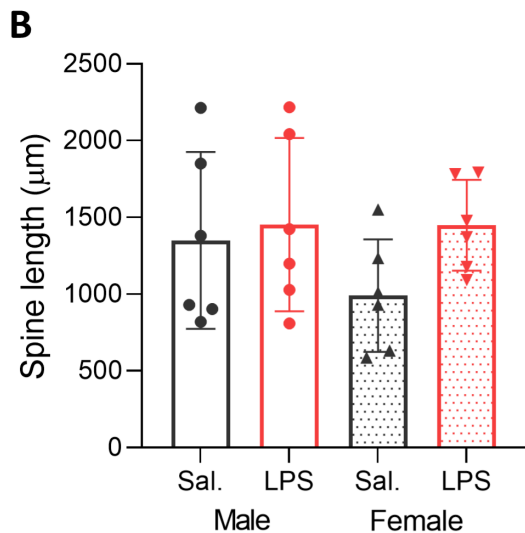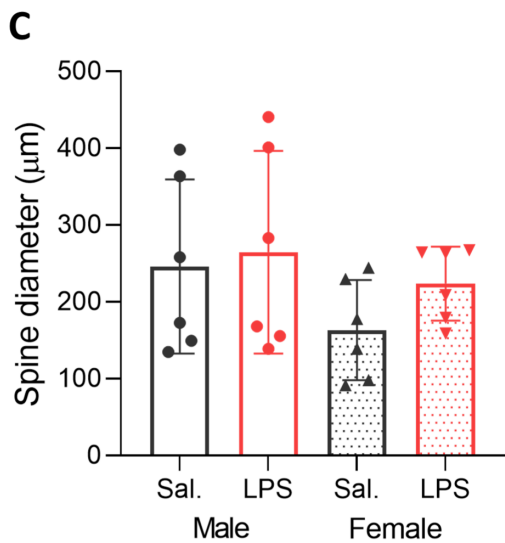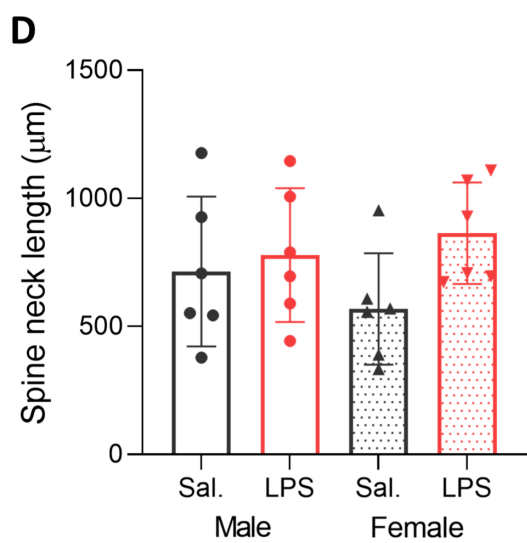

# P12 Basal dendrite

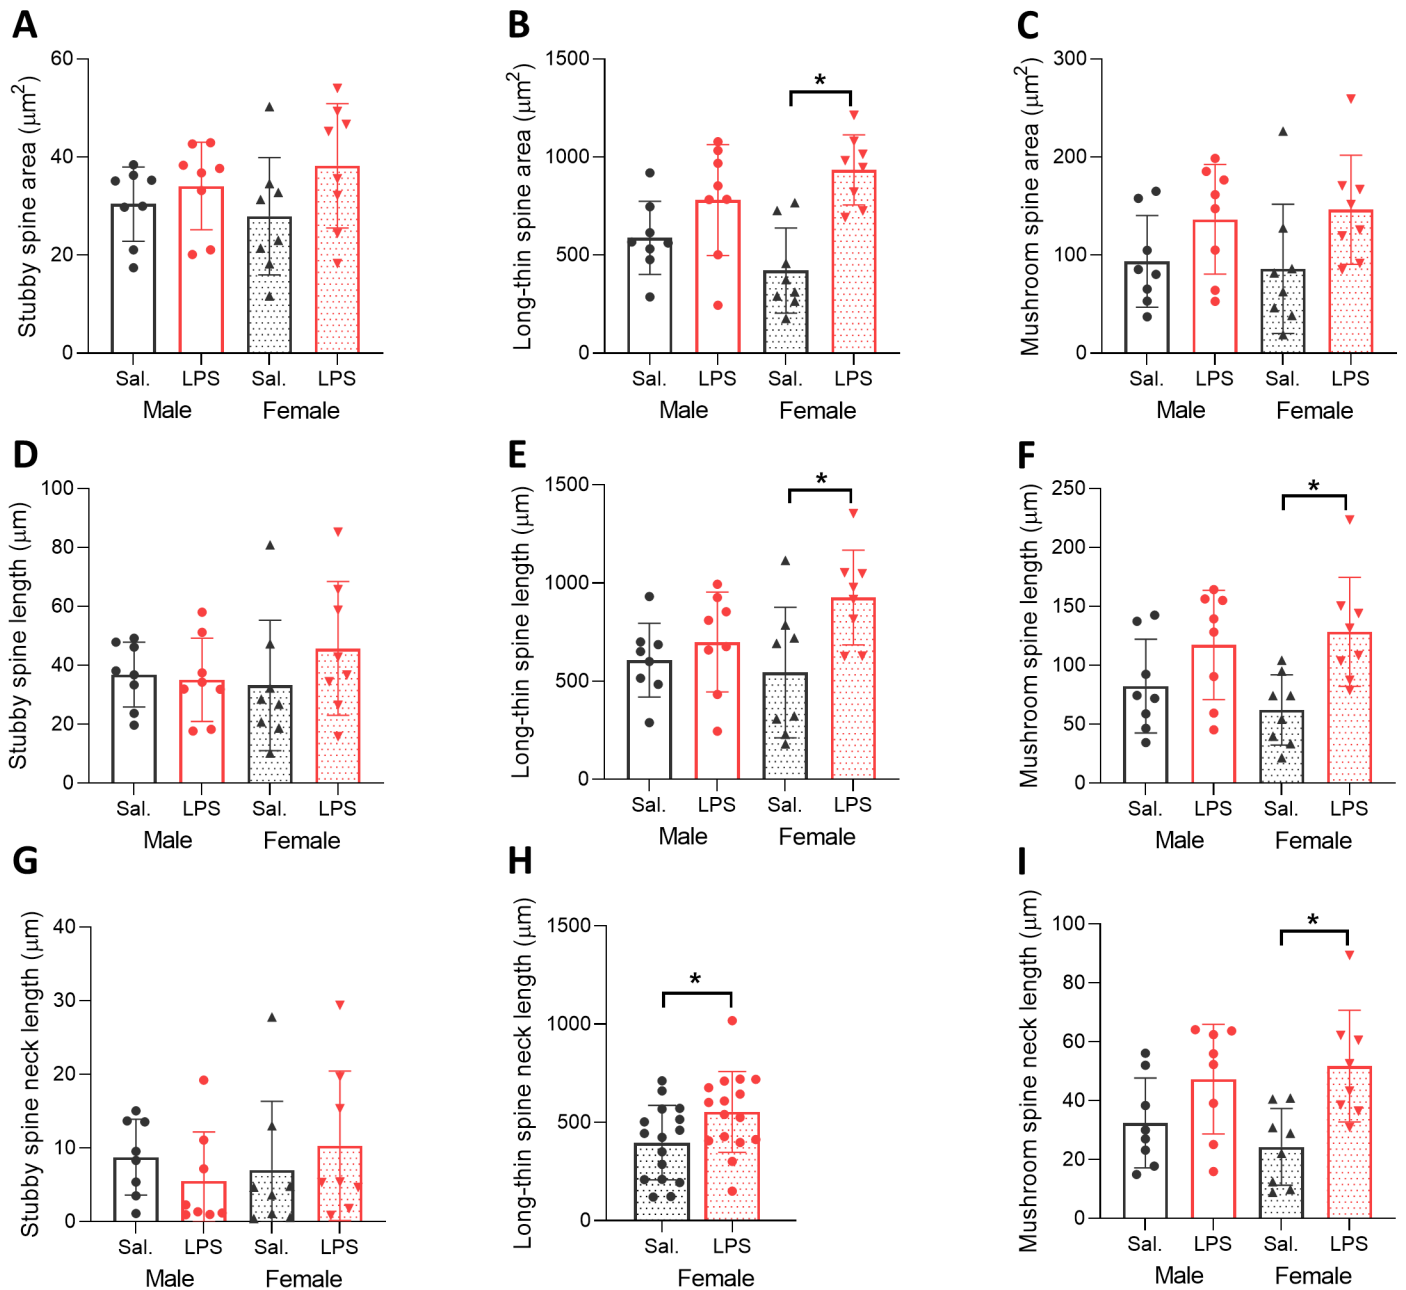

Supplement: BPH-179-4400-s001.pdf [file BPH-179-4400-s001.pdf]
